# Supplementary material
Source: PubMed Central journal article supplement (PMC4067053)
Supplement: NIHMS580939-supplement-01.pdf [file NIHMS580939-supplement-01.pdf]

# Supplemental information

## Figures and Legends

### Figure S1

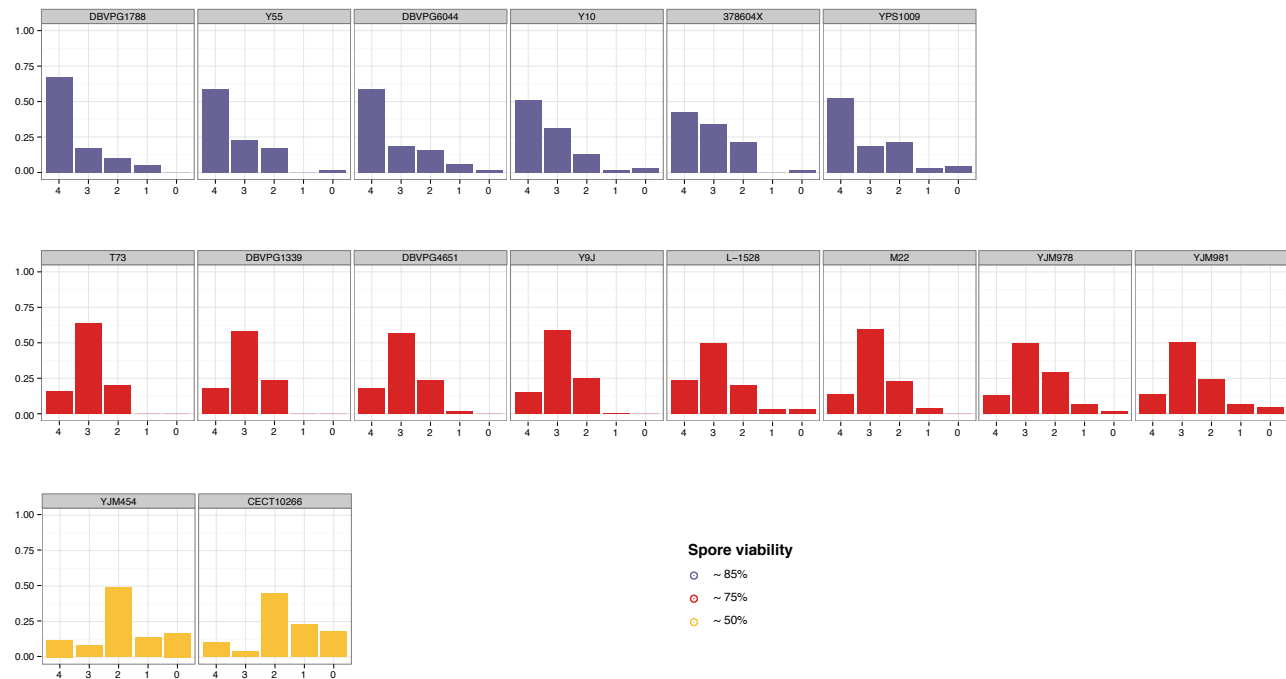

**Figure S1, related to Figure 1 - Segregation pattern of the lethal phenotype in identified reproductive isolation cases**

Each diagram represents the distribution of tetrad types from crosses between S288c and the strain indicated. Crosses are color coded according to their segregation pattern and the observed offspring viability. The horizontal axis indicates the number of viable spores per tetrad, and the vertical axis indicates the fraction of each type of tetrad observed.

**Figure S2**

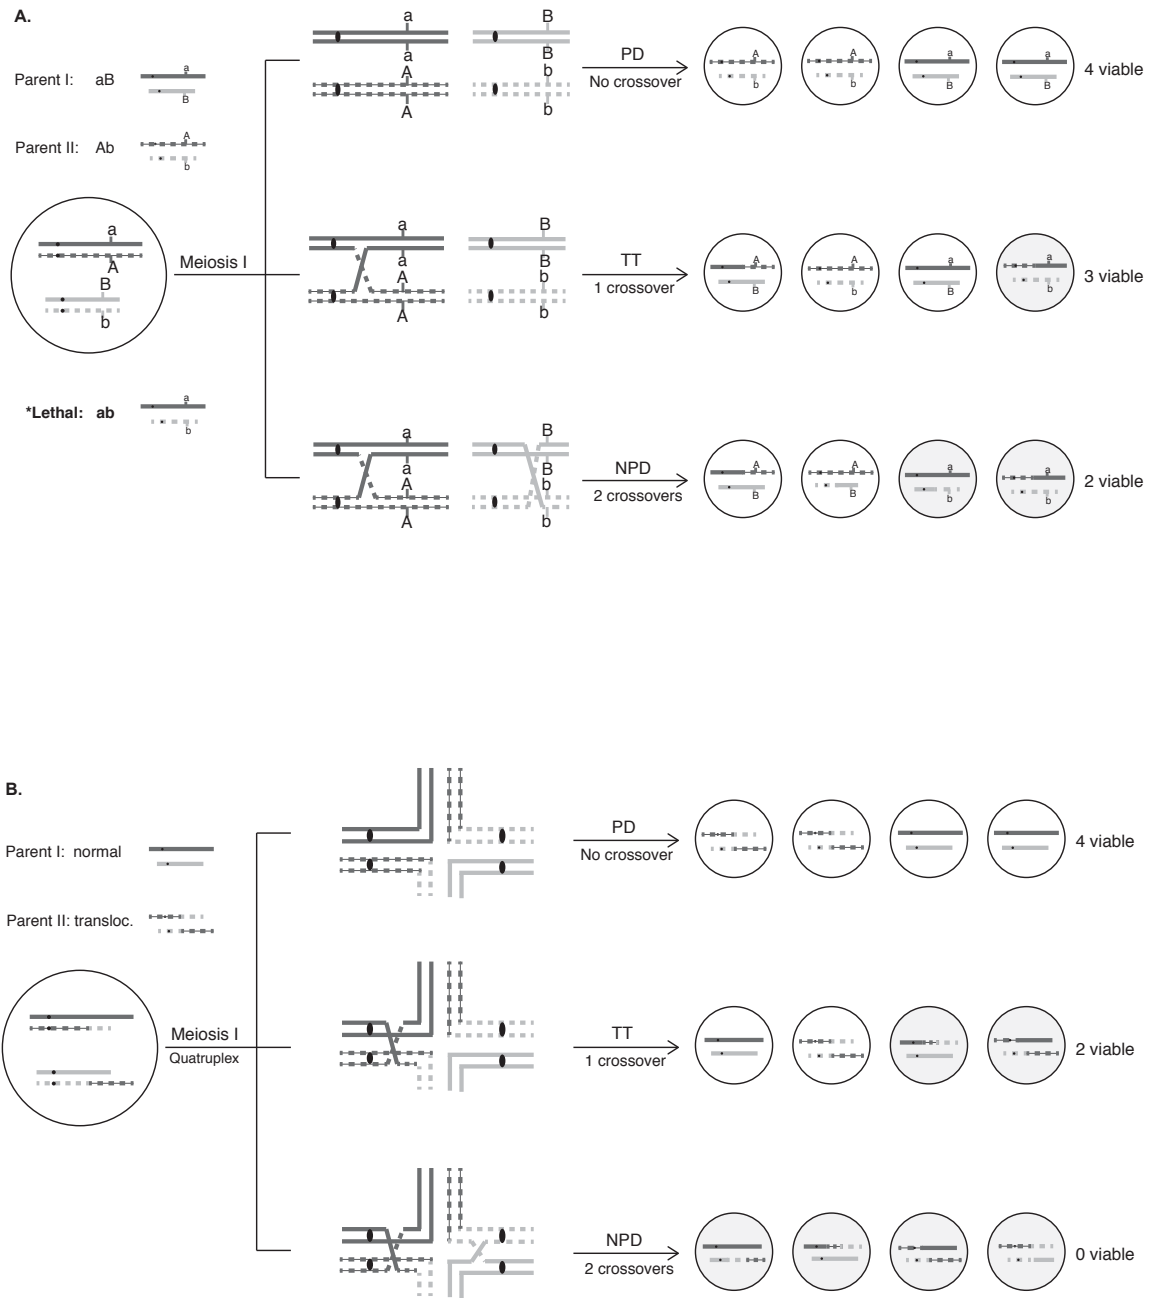

**Figure S2, related to Experimental Procedures - Schematics of theoretical tetrad segregation**

**A. Genic model.** Distribution of the tetrad types when two independent genes are involved. Lethal combination will follow Mendelian segregation and be united in 1/4 of the offspring, considering that tetrads with 4 viable spores are parental ditypes (PD), 3 viable spores are tetratypes (TT) and 2 viable spores are non-parental ditypes (NPD).

**B. Chromosomal model.** Distribution of the tetrad types in the case of diploid heterozygote for a reciprocal translocation. Any recombination will lead to offspring lethality and only progenies with balanced set of either parental chromosomal configuration will be viable. Tetrads with 4 viable spores correspond to PD, 3 viable spores to TT and 2 viable spores to NPD.

**Figure S3.**

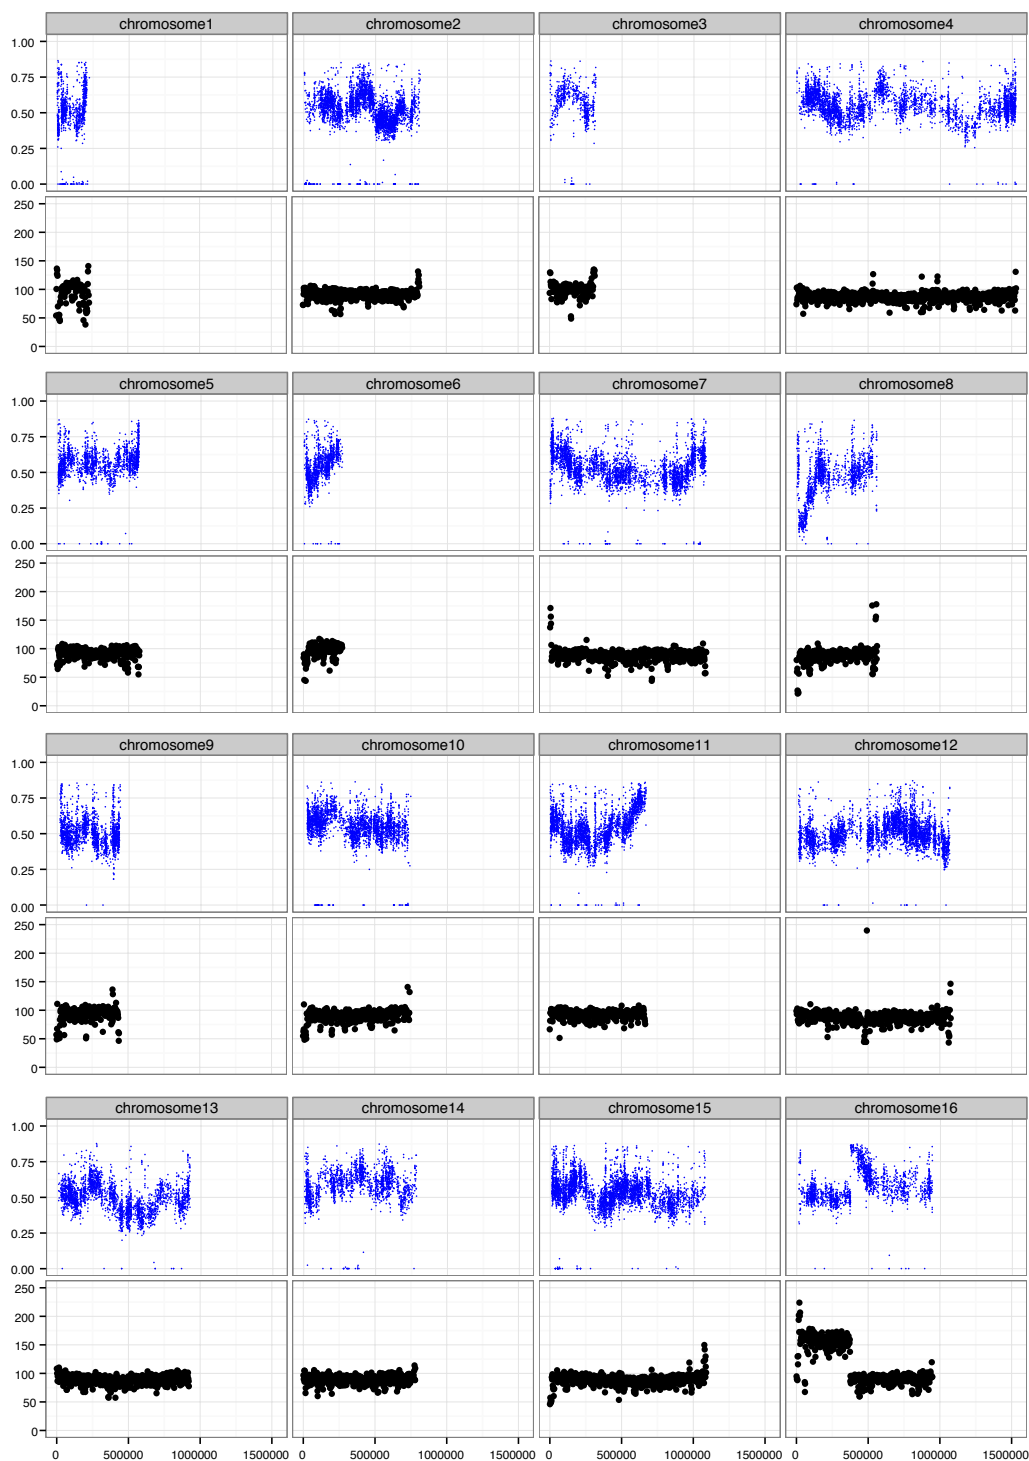

**Figure S3, related to Figure 3 - Mapping results using bulk segregant analysis strategy for the cross between DBVPG1339 and S288c**

Whole genome mapping result obtained using bulk segregant data from cross between DBVPG1339 and S288c. The upper vertical axis corresponds to allele frequencies of S288c. The lower vertical axis represents the sequencing coverage in a 2 kb window. The theoretical coverage was expected to be 100X if a single copy was present.

**Figure S4.**

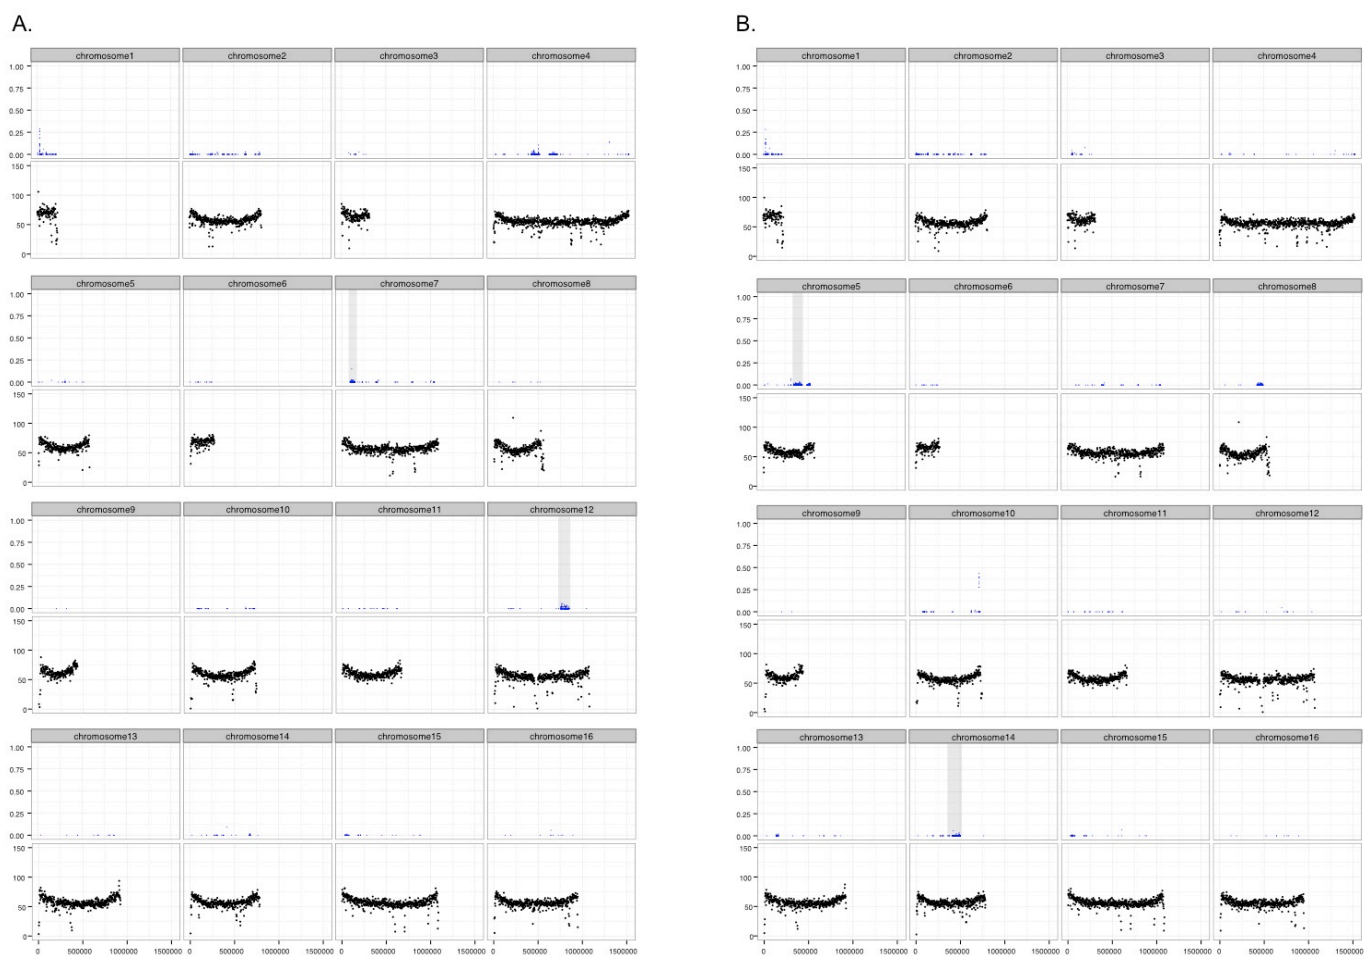

**Figure S4, related to Experimental Procedures and Figure 4 - Mapping results for the backcrossed segregants CS-B5 and YS-B5**

Allele frequency and coverage from sequencing data of backcrossed segregants CS-B5 (A) and YS-B5 (B). The upper vertical axis corresponds to allele frequencies of S288c. The lower vertical axis represents the sequencing coverage in a 2 kb window. Regions presented continuous allele frequency  $\sim 0$ , which are highlighted in grey boxes.

**A. Segregant CS-B5.** Two regions were mapped. The first region was approximately 60 kb in length, located on the left-arm of chromosome VII (85000 - 145000) and the second was a 120 kb region on the right-arm of chromosome XII (725000 - 845000). Coverage  $\sim 50X$  indicates the presence of a single genome copy.

**B. Segregant YS-B5.** Two regions were mapped. The first one was a 105 kb region on the right-arm of chromosome V (385000 - 490000) and the second was a 85 kb region on the left-arm of chromosome XIV (415000 - 500000). Coverage  $\sim 50X$  indicates the presence of a single genome copy.

**Table S1.**

| Strains   | Source              | Location     | Offspring viability | Estimated divergence to S288c (%) | Reference              |
|-----------|---------------------|--------------|---------------------|-----------------------------------|------------------------|
| 273614X   | Clinical            | UK           | 100%                | 0.34                              | Schacherer et al. 2009 |
| CLIB192   | Baker               | France       | 100%                | 0.11                              | Schacherer et al. 2009 |
| CLIB413   | Fermented Rice      |              | 100%                | 0.36                              | Schacherer et al. 2009 |
| T7        | Oak tree            | US           | 100%                | 0.49                              | Justin Fay*            |
| YJM421    | Clinical            | US           | 100%                | 0.35                              | Schacherer et al. 2009 |
| EM93_3    | Rotting fig         | US           | 98%                 | 0.14                              | Schacherer et al. 2009 |
| WE372     | Wine                | South Africa | 98%                 | 0.26                              | Schacherer et al. 2009 |
| YJM320b   | Clinical            | US           | 96%                 | 0.32                              | Schacherer et al. 2009 |
| CLIB272   | Beer                | US           | 95%                 | 0.23                              | Schacherer et al. 2009 |
| DBVPG6861 | Polluted water      |              | 95%                 |                                   |                        |
| YJM434    | Clinical            | Europe       | 95%                 | 0.28                              | Schacherer et al. 2009 |
| YJM678    | Clinical            |              | 95%                 |                                   |                        |
| CLIB483   | Fermentation        | France       | 94%                 | 0.29                              | Schacherer et al. 2009 |
| RM11      | Vineyard            | US           | 93%                 | 0.36                              | Justin Fay*            |
| CLIB154   | Wine                | Russia       | 93%                 | 0.21                              | Schacherer et al. 2009 |
| CLIB382   | Beer                | Japan        | 93%                 | 0.25                              | Schacherer et al. 2009 |
| DBVPG3591 | Cocoa beans         |              | 93%                 | 0.23                              | Schacherer et al. 2009 |
| I14       | Vineyard            | Italy        | 93%                 | 0.25                              | Schacherer et al. 2009 |
| UC8       | Wine                | South Africa | 93%                 | 0.28                              | Schacherer et al. 2009 |
| DBVPG1106 | Grapes              | Australia    | 92%                 | 0.35                              | Skelly et al. 2013     |
| YJM975    | Clinical            | Italy        | 92%                 | 0.36                              | Skelly et al. 2013     |
| CLIB219   | Wine                | Russia       | 92%                 | 0.44                              | Schacherer et al. 2009 |
| YJM280    | Clinical            | US           | 92%                 | 0.35                              | Schacherer et al. 2009 |
| Y9        | Ragi                | Indonesia    | 92%                 | 0.34                              | Schacherer et al. 2009 |
| Y12       | Palm wine           | Africa       | 92%                 | 0.35                              | Schacherer et al. 2009 |
| YJM269    | Apple juice         |              | 92%                 | 0.38                              | Schacherer et al. 2009 |
| K12       | Sake                | Japan        | 91%                 | 0.25                              | Schacherer et al. 2009 |
| YJM326    | Clinical            | US           | 91%                 | 0.32                              | Schacherer et al. 2009 |
| BC187     | Barrel fermentation | US           |                     |                                   |                        |
|           |                     |              | 91%                 | 0.37                              | Skelly et al. 2013     |
| L-1374    | Wine                | Chile        | 91%                 | 0.36                              | Skelly et al. 2013     |
| PW5       | Palm wine           | Nigeria      | 91%                 | 0.59                              | Justin Fay*            |
| Y3        | Palm wine           | Africa       | 91%                 | 0.38                              | Schacherer et al. 2009 |
| CBS7960   | Sugar cane          | South Africa | 90%                 | 0.39                              | Justin Fay*            |
| CECT10109 | Prickly pear        | Spain        | 90%                 | 0.31                              | Schacherer et al. 2009 |
| CLIB294   | Fermentation        | France       | 90%                 | 0.25                              | Schacherer et al. 2009 |
| DBVPG1794 | Soil                | Finland      | 90%                 | 0.29                              | Schacherer et al. 2009 |
| NC_02     | Forest              | US           | 90%                 | 0.43                              | Justin Fay*            |
| UC1       | Wine                | France       | 90%                 | 0.24                              | Schacherer et al. 2009 |
| YJM145    | Clinical            | US           | 90%                 | 0.37                              | Schacherer et al. 2009 |
| YJM413    | Clinical            |              | 90%                 | 0.33                              | Schacherer et al. 2009 |
| YJM440    | Clinical            | US           | 90%                 |                                   |                        |
| YPS1000   | Oak exudate         | US           | 90%                 | 0.41                              | Schacherer et al. 2009 |
| YPS128    | Oak                 | US           | 90%                 | 0.53                              | Skelly et al. 2013     |
| YPS163    | Oak exudate         | US           | 90%                 | 0.36                              | Schacherer et al. 2009 |
| DBVPG1788 | Soil                | Finland      | 86%                 | 0.36                              | Justin Fay*            |
| Y55       | Wine                | France       | 86%                 | 0.54                              | Skelly et al. 2013     |
| DBVPG6044 | Bili wine           | West Africa  | 86%                 | 0.60                              | Justin Fay*            |
| 378604X   | Clinical            | UK           | 84%                 | 0.41                              | Skelly et al. 2013     |
| YPS1009   | Oak tree            | US           | 84%                 | 0.50                              | Justin Fay*            |
| Y10       | Coconut             | Philippines  | 83%                 | 0.49                              | Justin Fay*            |
| YJM981    | Clinical            | Italy        | 73%                 | 0.29                              | Schacherer et al. 2009 |
| T73       | Wine                | Spain        | 73%                 | 0.23                              | Schacherer et al. 2009 |
| Y9J       | Wine                | Japan        | 73%                 | 0.28                              | Schacherer et al. 2009 |
| L-1528    | Wine                | Chile        | 72%                 | 0.35                              | Justin Fay*            |
| M22       | Wine                | Italy        | 71%                 | 0.24                              | Schacherer et al. 2009 |
| YJM978    | Clinical            | Italy        | 71%                 | 0.26                              | Schacherer et al. 2009 |
| DBVPG4651 | Tuber Magnatum      | Italy        | 71%                 | 0.28                              | Schacherer et al. 2009 |
| DBVPG1339 | Grape must          | Netherland   | 70%                 | 0.24                              | Schacherer et al. 2009 |
| CECT10266 | Tanning Liquor      | Spain        | 48%                 | 0.44                              | This study             |
| YJM454    | Clinical            | US           | 44%                 | 0.48                              | This study             |
| FY5       | Lab                 | US           | 98%                 | 0                                 | This study             |

**Table S1, related to Figure 1 - List of strains used in this study**

The offspring viability for crosses between listed strains and FY4 (isogenic to S288c) was estimated by dissecting 20 tetrads. Cross between FY4 and FY5 (isogenic to S288c) was performed as a control.

\* Publically available sequences from the Fay lab: <http://www.genetics.wustl.edu/jflab/>

**Table S2.**

| Strains   | Segregations |          |          |          |          | N° of tetrad analyzed | % viability |
|-----------|--------------|----------|----------|----------|----------|-----------------------|-------------|
|           | 4 viable     | 3 viable | 2 viable | 1 viable | 0 viable |                       |             |
| DBVPG1788 | 27           | 7        | 4        | 2        | 0        | 40                    | 87%         |
| Y55       | 41           | 16       | 12       | 0        | 1        | 70                    | 84%         |
| DBVPG6044 | 41           | 13       | 11       | 4        | 1        | 70                    | 82%         |
| Y10       | 36           | 22       | 9        | 1        | 2        | 70                    | 82%         |
| 378604X   | 30           | 24       | 15       | 0        | 1        | 70                    | 79%         |
| YPS1009   | 37           | 13       | 15       | 2        | 3        | 70                    | 78%         |
| T73       | 8            | 32       | 10       | 0        | 0        | 50                    | 74%         |
| DBVPG1339 | 51           | 165      | 68       | 0        | 0        | 284                   | 74%         |
| DBVPG4651 | 50           | 158      | 66       | 5        | 0        | 279                   | 73%         |
| Y9J       | 42           | 161      | 69       | 1        | 0        | 273                   | 72%         |
| L-1528    | 7            | 15       | 6        | 1        | 1        | 30                    | 72%         |
| M22       | 29           | 125      | 48       | 8        | 0        | 210                   | 71%         |
| YJM978    | 26           | 99       | 58       | 14       | 3        | 200                   | 66%         |
| YJM981    | 41           | 149      | 73       | 20       | 13       | 296                   | 66%         |
| YJM454    | 12           | 8        | 49       | 14       | 17       | 100                   | 46%         |
| CECT10266 | 10           | 4        | 45       | 23       | 18       | 100                   | 41%         |

**Table S2, related to Figure S1 - Lethal phenotype segregation in reproductive isolated strains**

Additional tetrads were dissected for strains with low offspring viability and the segregation of the lethal phenotype were listed.
